# Supplementary material for: Shared facial emotion processing functional network findings in medication-naïve major depressive disorder and healthy individuals: detection by sICA
Source: Springer Nature journal article supplement (doi:10.1186/s12888-018-1631-0), 2018-04-10
Supplement: MOESM1 [file 15604672]

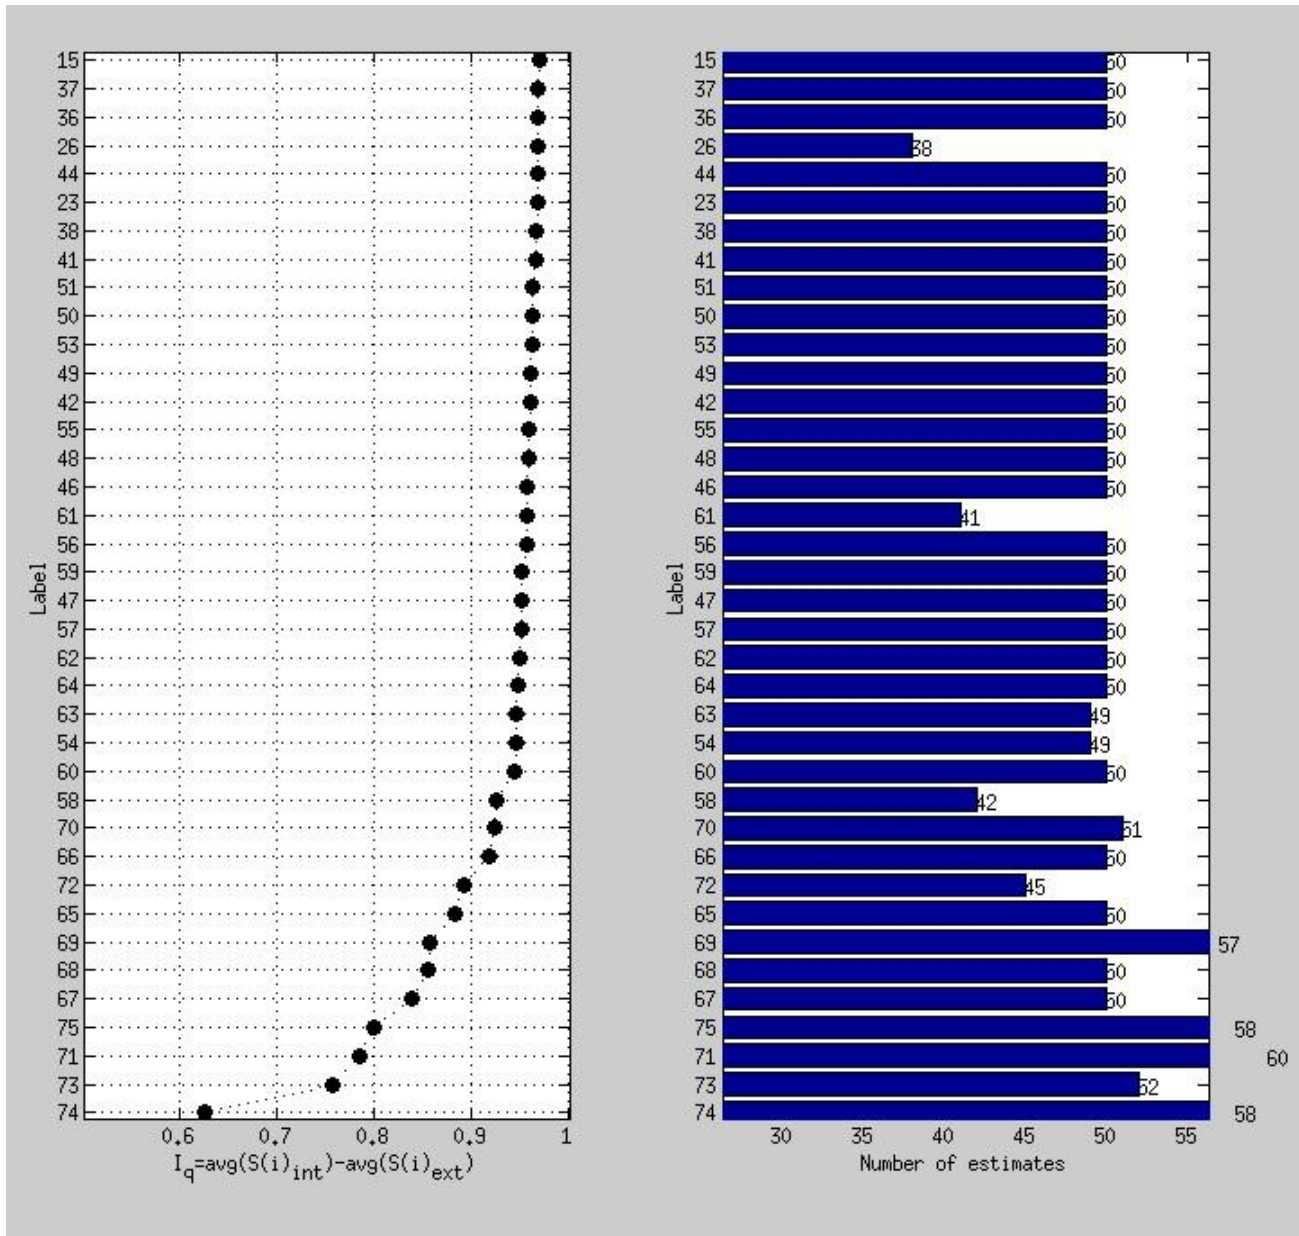

Figure S1: ICASSO results: Stability quality index ( $I_q$ ) and number of ICA estimates in the estimate-clusters. The stability index of each component was greater than 0.90.
