# Supplementary material for: Shared facial emotion processing functional network findings in medication-naïve major depressive disorder and healthy individuals: detection by sICA
Source: Springer Nature journal article supplement (doi:10.1186/s12888-018-1631-0), 2018-04-10
Supplement: MOESM2 [file 15604672]

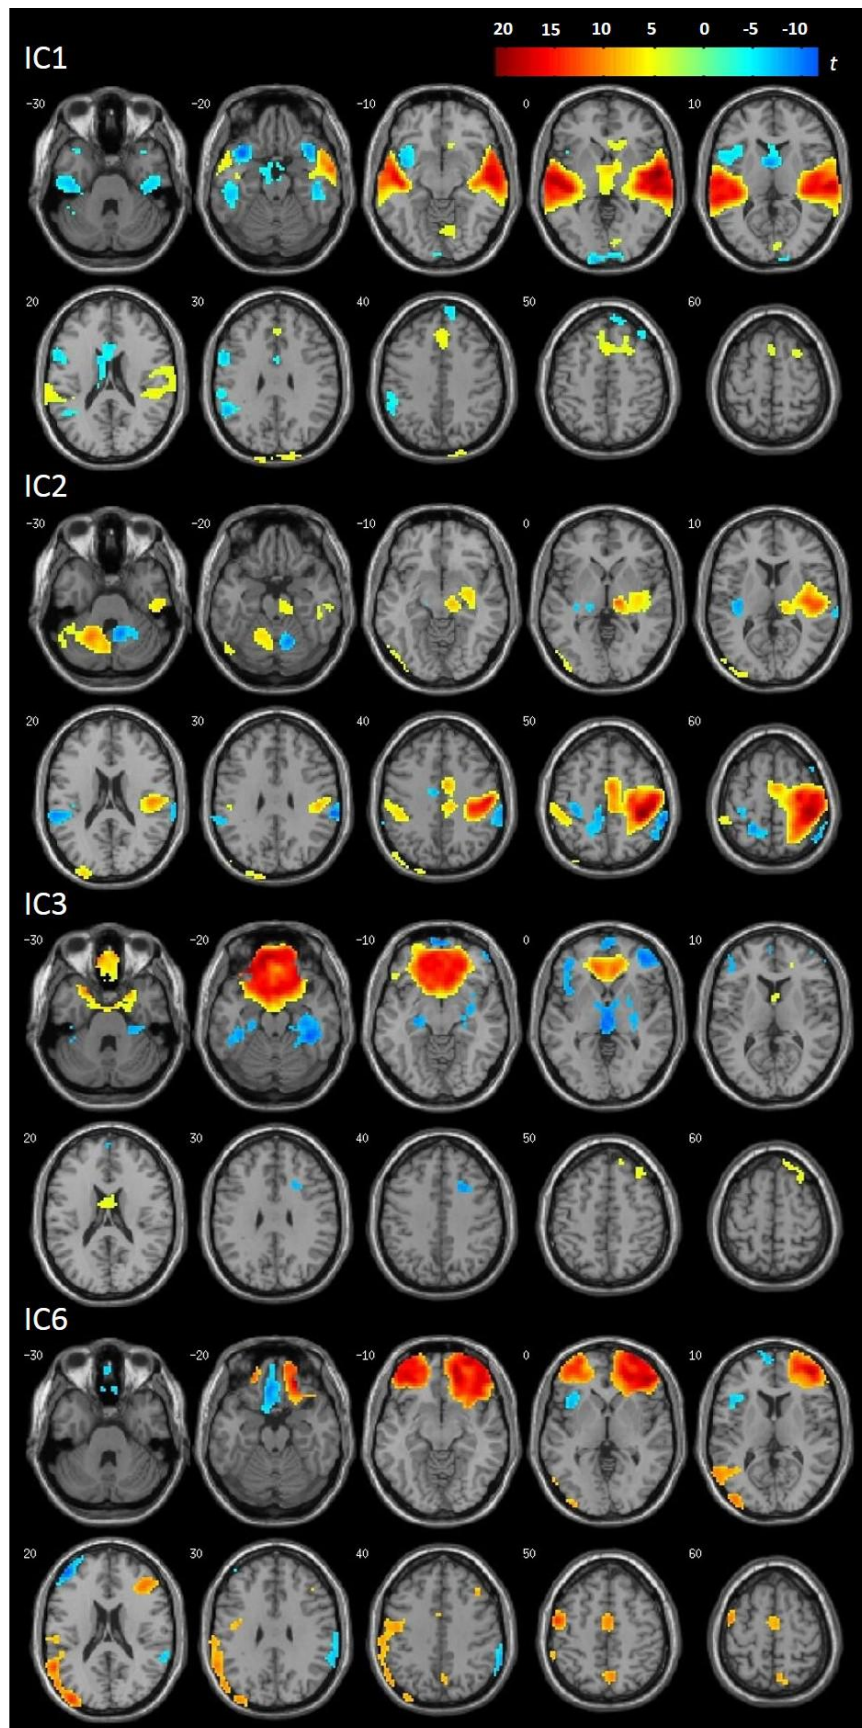

IC7

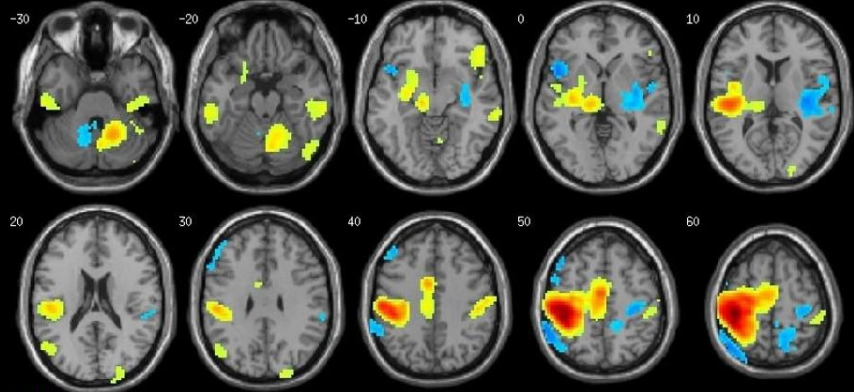

IC8

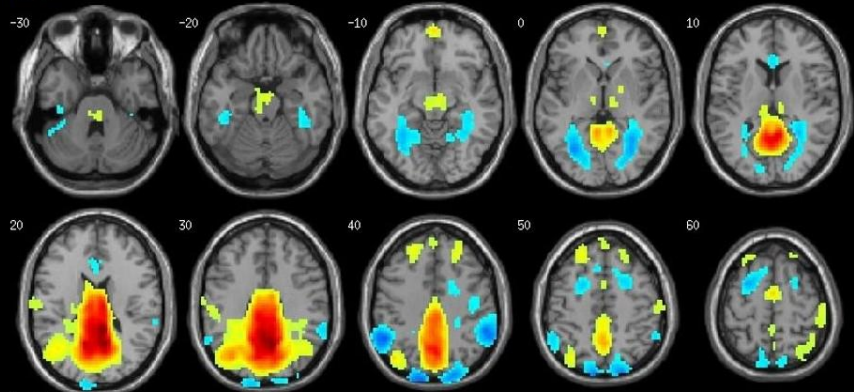

IC9

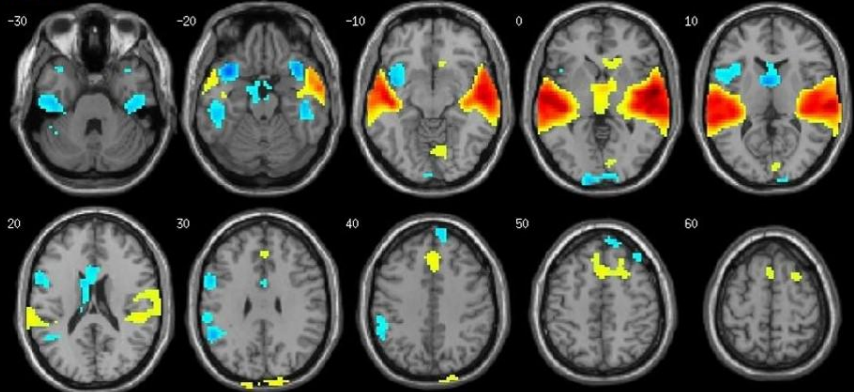

IC10

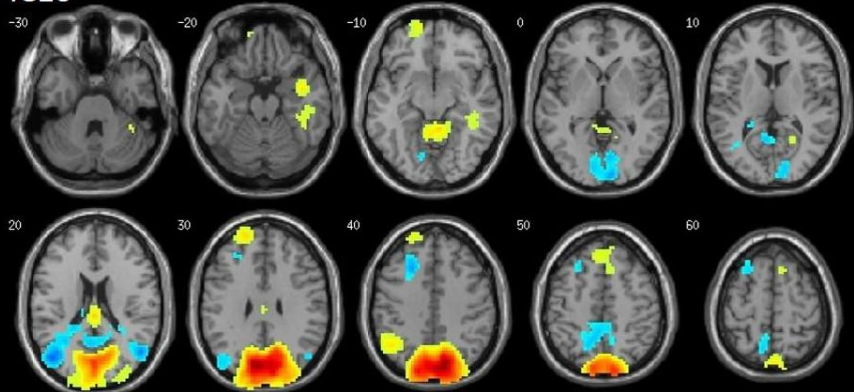

### IC11

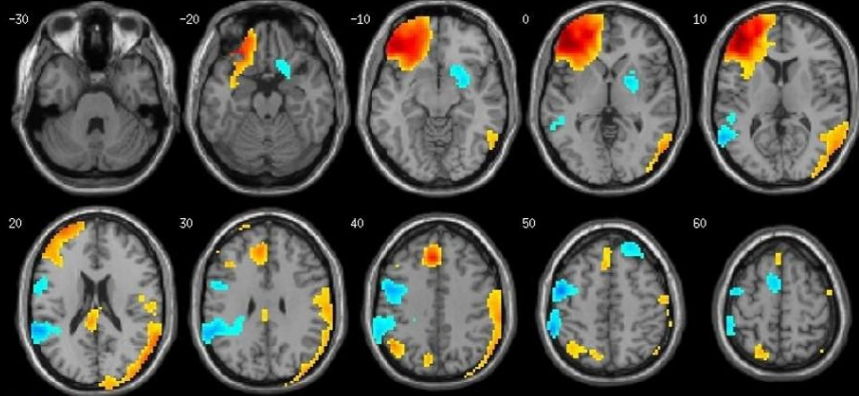

### IC13

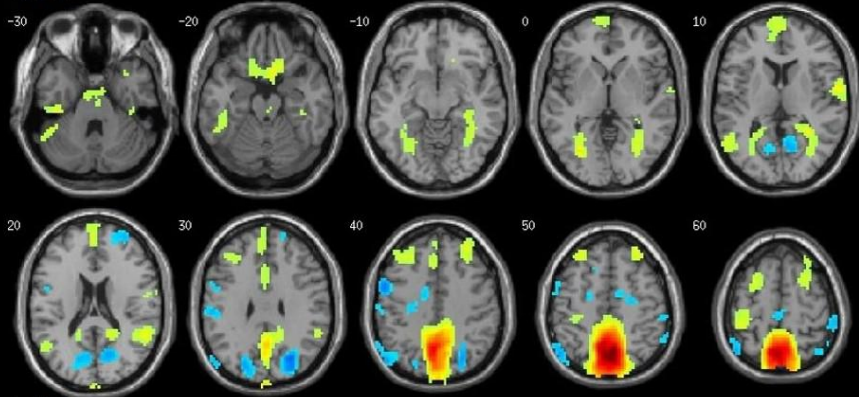

### IC14

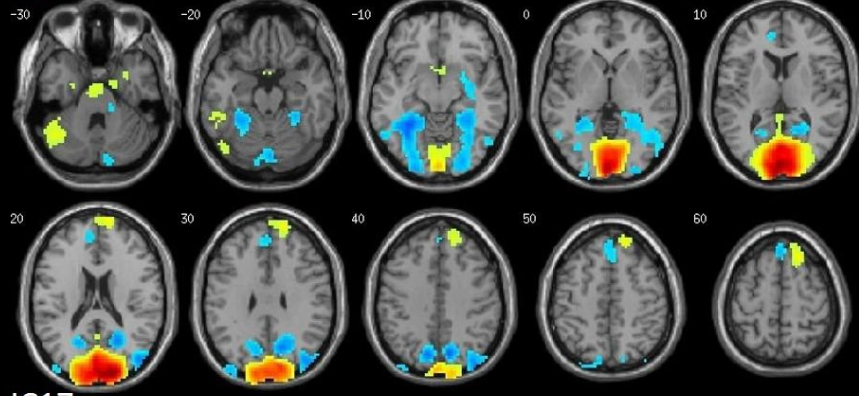

### IC17

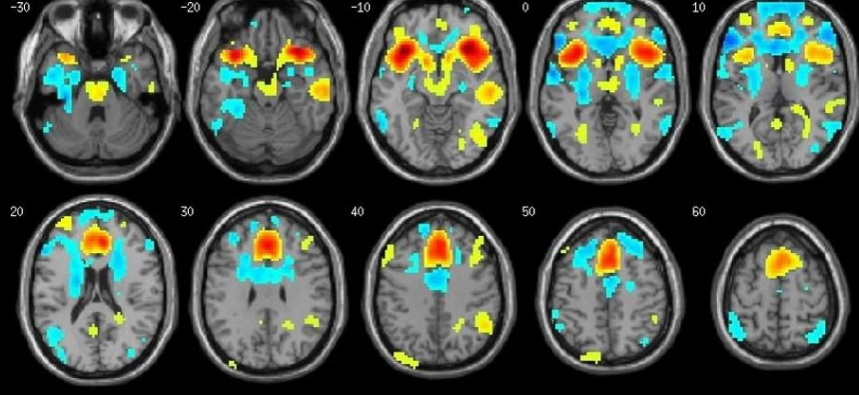

IC18

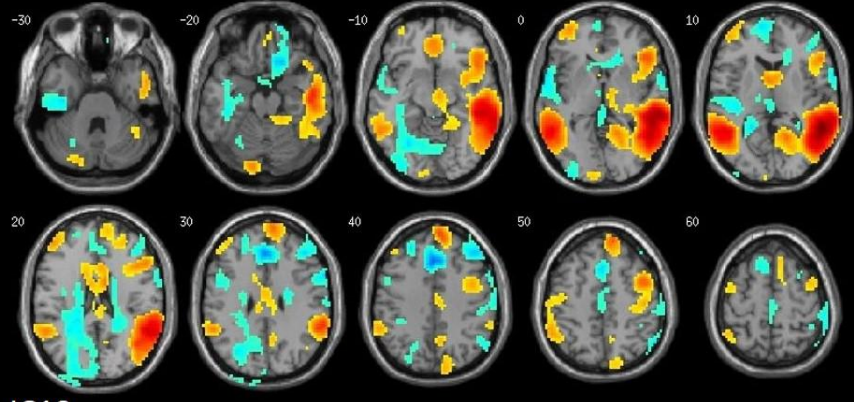

IC19

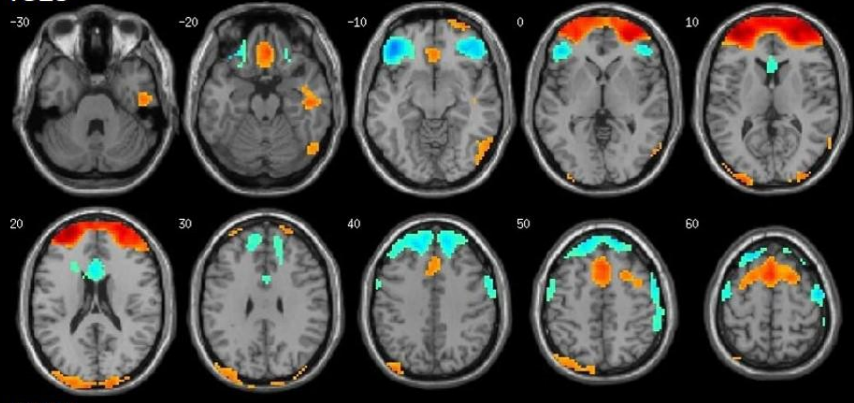

IC20

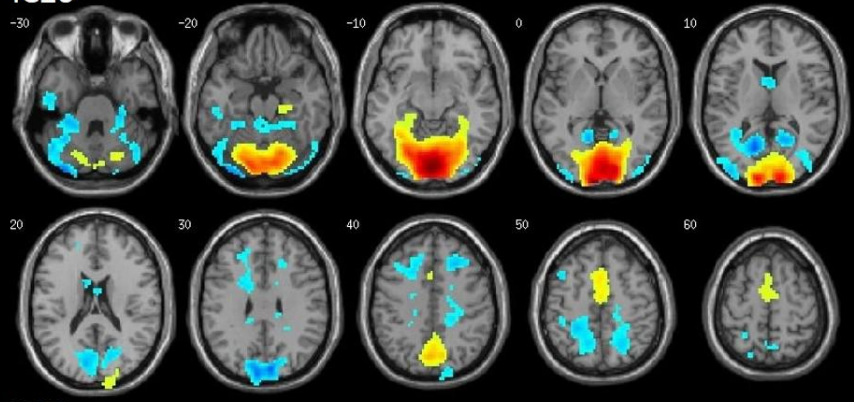

IC22

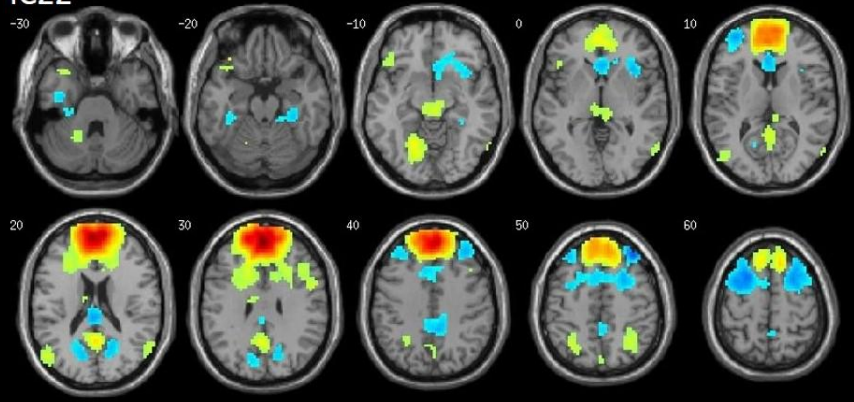

IC23

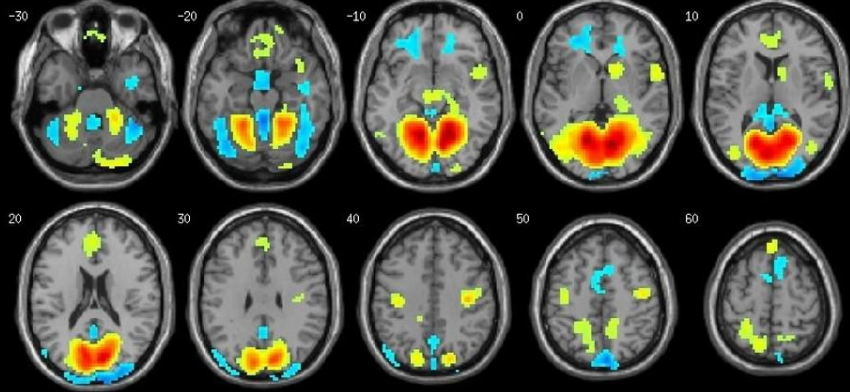

IC31

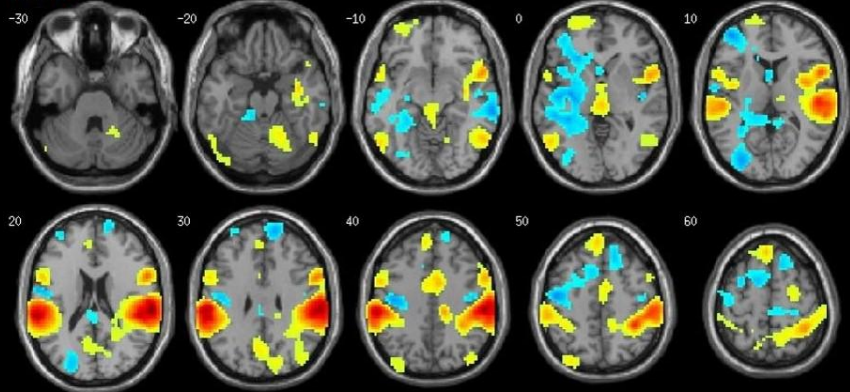

IC33

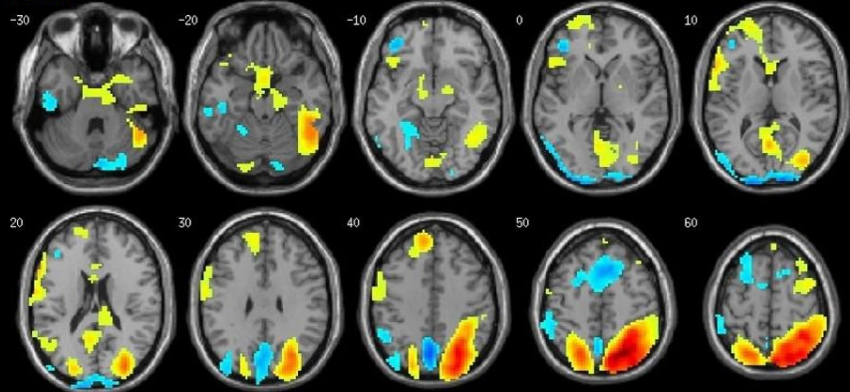

IC34

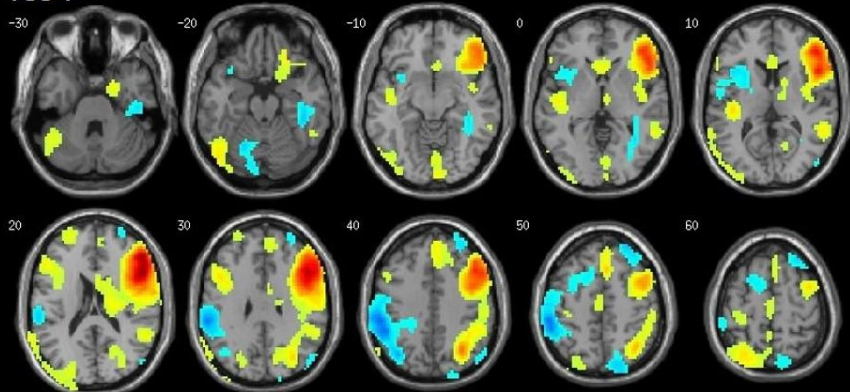

IC35

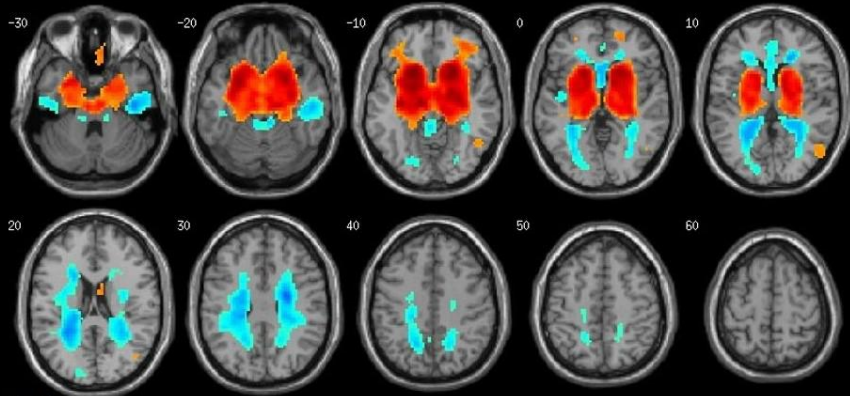

IC36

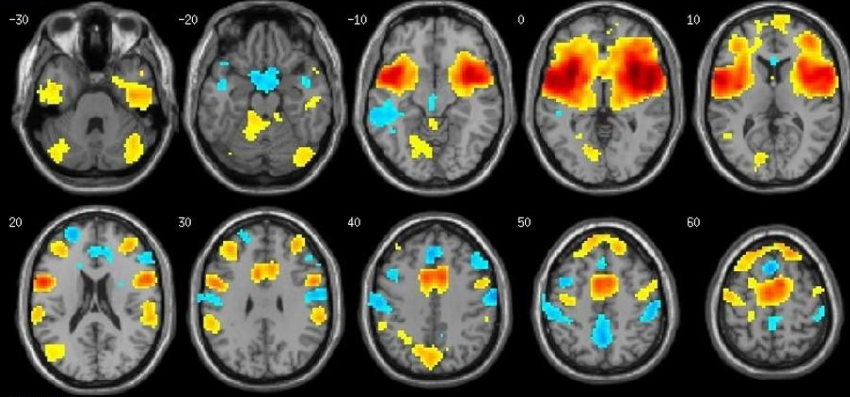

IC37

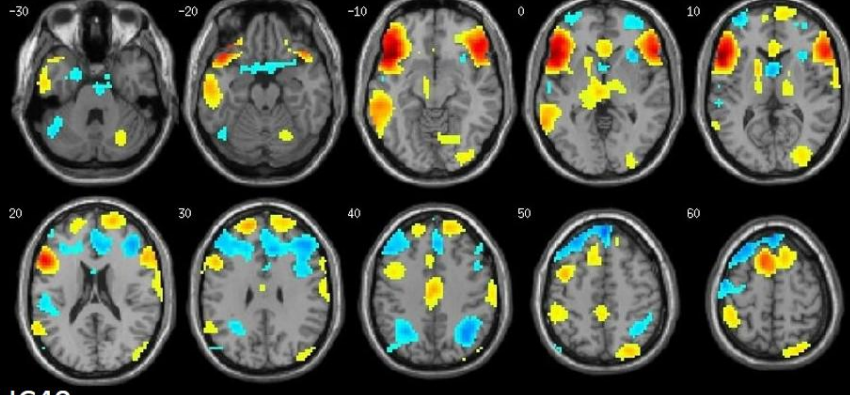

IC40

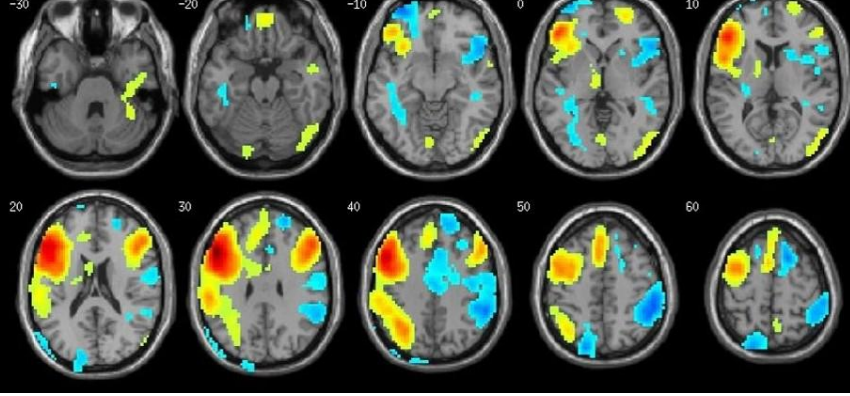

IC44

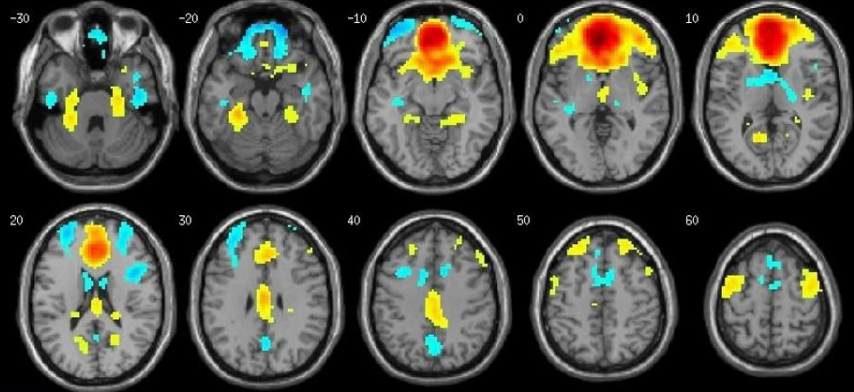

IC45

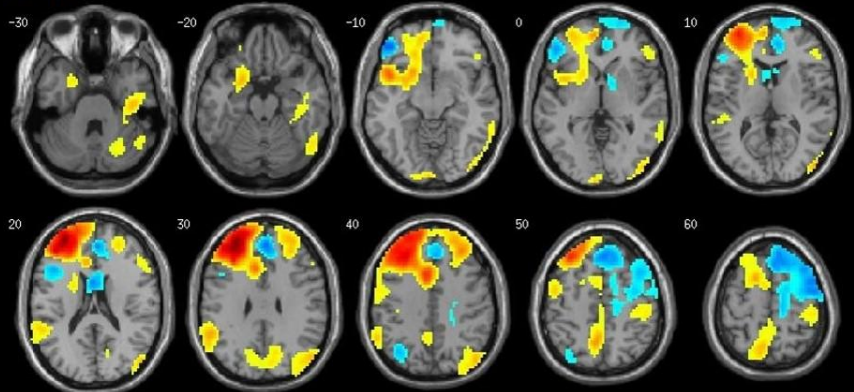

IC50

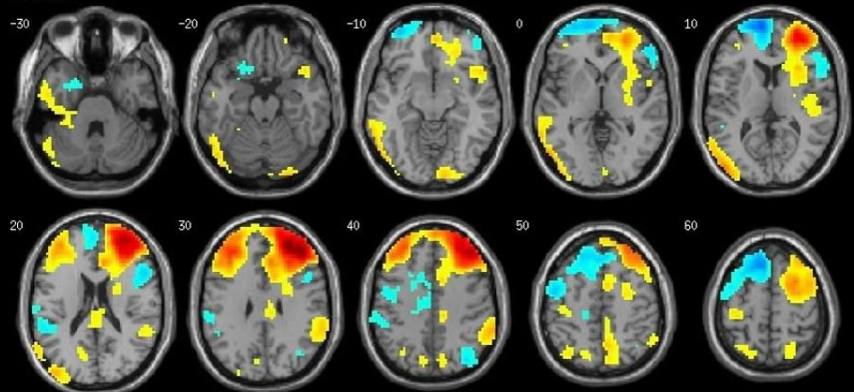

IC52

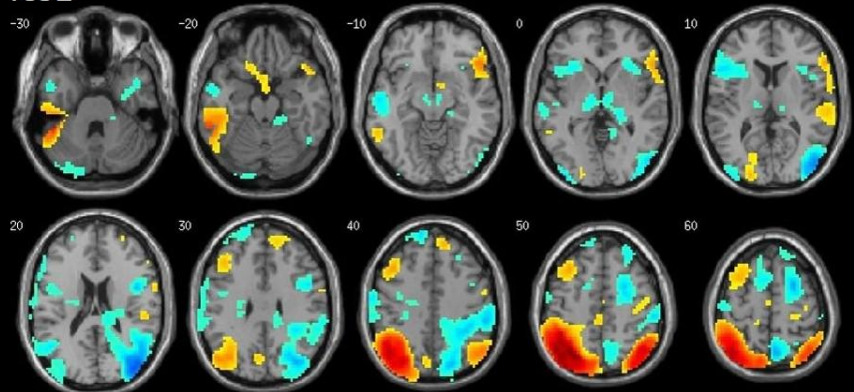

IC54

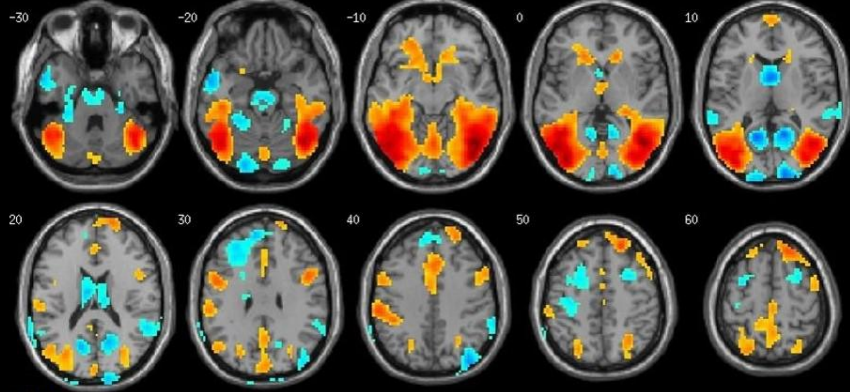

IC55

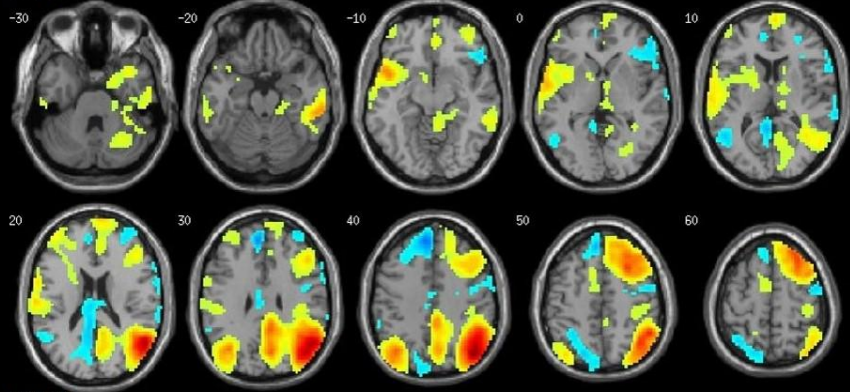

IC57

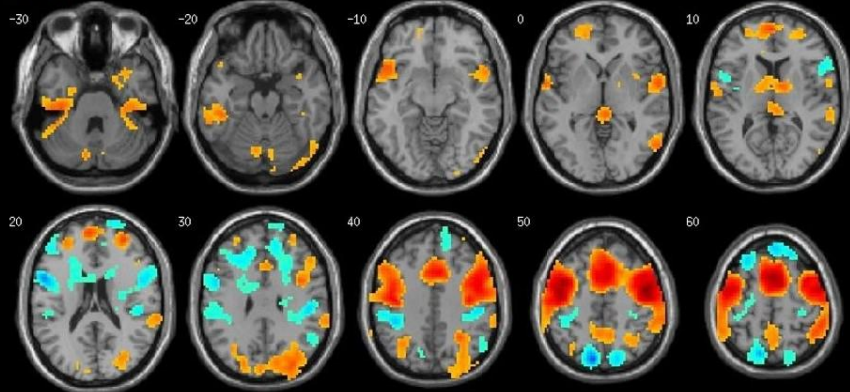

IC60

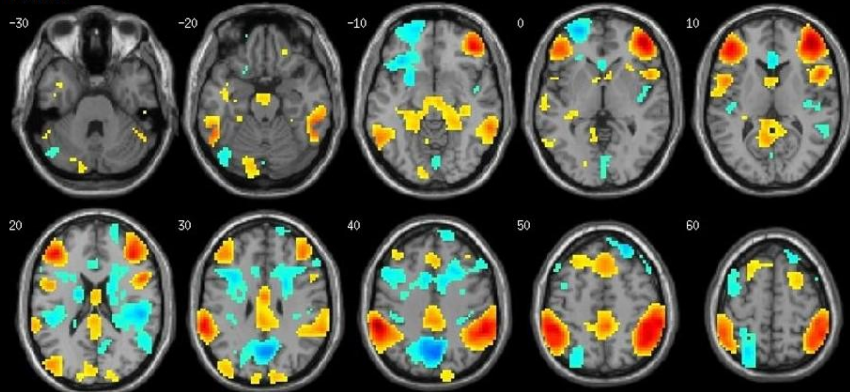



Figure S2. Spatial distributions of 32 ICs. Colors on the Montreal Neurological Institute (MNI) T1 templates demonstrate the spatial distribution of the 32 ICs labeled by their IC numbers. The red and blue colors represent positive and negative sub-networks of each IC, respectively. Only clusters surviving corrected voxel height  $p < 0.05$  (FDR-corrected for whole-brain analysis) and  $k > 100$  are shown. The numbers at top-left of each brain image indicates the Z coordinates in MNI space. The color bar indicates  $t$  values. Right side of the brain image is the right side of the brain.
