# Supplementary material for: Shared facial emotion processing functional network findings in medication-naïve major depressive disorder and healthy individuals: detection by sICA
Source: Springer Nature journal article supplement (doi:10.1186/s12888-018-1631-0), 2018-04-10
Supplement: MOESM3 [file 15604672]

Table S1: Positive sub-networks of 32 ICs

|                                                          |     |                      |                  |             | MNI Coordinates |          |               |
|----------------------------------------------------------|-----|----------------------|------------------|-------------|-----------------|----------|---------------|
|                                                          | L/R | BA                   | Size<br>(voxels) | Z-Value     | X               | Y        | Z             |
| <b>IC1</b>                                               |     |                      |                  |             |                 |          |               |
| Precentral gyrus, IFG,<br>Postcentral gyrus, STG         | L/R | 6                    | 2226/2195        | 18.0/17.4   | -57/63          | -6/0     | 21/12         |
| Cerebellum posterior lobe                                | L/R |                      | 452              | 9.7         | 15              | -66      | -33           |
| <b>IC2</b>                                               |     |                      |                  |             |                 |          |               |
| Postcentral gyrus, SMA,<br>MFC, IPL, MFG                 | R   | 3, 4, 6              | 4484             | 18.5        | 42              | -33      | 54            |
| Cerebellum anterior/posterior lobe                       | L   |                      | 1184             | 10.7        | -18             | -57      | -36           |
| ITG                                                      | R   | 20                   | 117              | 7.1         | 57              | -21      | -27           |
| IPL, Postcentral gyrus,                                  | L   | 40                   | 299              | 8.0         | -48             | -30      | 42            |
| <b>IC3</b>                                               |     |                      |                  |             |                 |          |               |
| IFG, MFC, SFG, MFG, ACC,<br>Orbital gyrus                | L/R | 11                   | 3686             | 16.6        | -6              | 51       | -18           |
| <b>IC6</b>                                               |     |                      |                  |             |                 |          |               |
| MFG, IFG, MFC                                            | R   | 10, 11, 47           | 2438             | 13.2        | 42              | 30       | -15           |
| MFG, SFG                                                 | L   | 11                   | 834              | 11.1        | -36             | 45       | -9            |
| Precentral gyrus, MTG, IPL, STG<br>MOG                   | L   | 40                   | 1222             | 8.9         | -39             | -87      | 18            |
| Precuneus                                                | R   | 7                    | 167              | 6.2         | 3               | -66      | 45            |
| MFC                                                      | R   | 6                    | 141              | 6.2         | 3               | -6       | 51            |
| <b>IC7</b>                                               |     |                      |                  |             |                 |          |               |
| Postcentral gyrus, Precentral<br>gyrus,<br>IPL, MCC, SMA | L   | 3, 4, 6, 40          | 4853             | 21.4        | -39             | -30      | 57            |
| Cerebellum anterior/posterior lobe                       | R   |                      | 1139             | 10.8        | 18              | -57      | -30           |
| ITG                                                      | L   | 20                   | 171              | 7.8         | -54             | -33      | -24           |
| IFG                                                      | R   | 38, 47               | 223              | 7.0         | 51              | 33       | -9            |
| Postcentral gyrus,                                       | R   | 2                    | 297              | 8.6         | 48              | -24      | 39            |
| <b>IC8</b>                                               |     |                      |                  |             |                 |          |               |
| Precuneus, PCC, Cuneus,                                  | L/R | 7, 19, 30,<br>31, 39 | 6178             | 25.4        | 9               | -45      | 21            |
| SFG                                                      | L/R | 8                    | 312/176          | 7.9/7.4     | 0/24            | 51/39    | 45/45         |
| MFC                                                      | R   | 6                    | 244              | 9.3         | 3               | -3       | 60            |
| <b>IC9</b>                                               |     |                      |                  |             |                 |          |               |
| STG, MTG, Insula,                                        | L/R | 21, 22               | 2619/1982        | 22.4/21.4   | 57/-60          | -9/-15   | 0/3           |
| SFG, MFC                                                 | L/R | 6                    | 329              | 6.6         | 0               | 15       | 57            |
| <b>IC10</b>                                              |     |                      |                  |             |                 |          |               |
| Precuneus, Cuneus                                        | L/R | 7, 18, 19            | 2866             | 23.4        | 15              | -78      | 36            |
| SFG                                                      | L   | 8, 9, 10, 11         | 112/150/126      | 6.6/8.5/6.5 | -15/-18/-6      | 63/57/33 | -<br>12/33/54 |
| Cerebellum anterior lobe                                 | L/R |                      | 206              | 8.7         | 6               | -45      | -6            |

|                                                            |     |                   |         |         |        |       |       |
|------------------------------------------------------------|-----|-------------------|---------|---------|--------|-------|-------|
| IPL                                                        | L   | 40                | 187     | 8.0     | -45    | -60   | 39    |
| <b>IC11</b>                                                |     |                   |         |         |        |       |       |
| IFG, MFG, MFC                                              | L   | 10, 11, 47        | 2984    | 16.3    | -42    | 48    | 6     |
| MTG, STG, Postcentral gyrus,<br>Precentral gyrus, IPL, MOG | R   | 19, 39, 40        | 1511    | 9.1     | 54     | -75   | 18    |
| MFC                                                        | L   | 8, 9              | 357     | 10.8    | -3     | 33    | 39    |
| IPL                                                        | L   | 7                 | 288     | 9.4     | -42    | -66   | 45    |
| <b>IC13</b>                                                |     |                   |         |         |        |       |       |
| Precuneus, Cuneus                                          | L/R | 7, 31             | 3437    | 24.0    | 6      | -66   | 51    |
| Rectal gyrus                                               | L/R | 11, 25, 47        | 478     | 7.6     | 6      | 12    | -21   |
| MOG                                                        | L   |                   | 442     | 9.0     | -30    | -69   | 0     |
| MFC                                                        | L   | 9, 10             | 477     | 6.9     | -3     | 54    | 15    |
| MTG                                                        | L   | 39                | 150     | 6.2     | -57    | -60   | 6     |
| MFG, SFG                                                   | L/R | 6, 8, 9, 46       | 220/342 | 7.1/7.5 | -27/33 | 39/48 | 48/42 |
| <b>IC14</b>                                                |     |                   |         |         |        |       |       |
| MOG, Cuneus, PCC, Precuneus                                | L/R | 17, 18, 19        | 2820    | 23.0    | 18     | -93   | 21    |
| Cerebellum anterior/posterior lobe                         | L   |                   | 239     | 7.1     | -42    | -51   | -33   |
| SFG                                                        | R   | 6, 8, 9, 10       | 443     | 8.6     | 18     | 43    | 27    |
| <b>IC17</b>                                                |     |                   |         |         |        |       |       |
| IFG, Insula, SFG                                           | L/R | 13, 38, 47        | 3504    | 24.5    | 33     | 24    | -12   |
| MFC, SFG, ACC, SMA,                                        | L/R | 6, 8, 9, 32       | 1942    | 18.4    | 3      | 33    | 33    |
| MTG                                                        | R   | 21                | 516     | 13.3    | 57     | -24   | -12   |
| MOG                                                        | R   |                   | 222     | 7.2     | 48     | -72   | -9    |
| IPL                                                        | R   | 40                | 218     | 8.5     | 51     | -51   | 39    |
| MFG                                                        | R   | 9                 | 142     | 6.8     | 42     | 21    | 36    |
| <b>IC18</b>                                                |     |                   |         |         |        |       |       |
| MTG, STG, IFG, MOG, IPL,<br>Fusiform gyrus                 | R   | 22, 37, 39,<br>40 | 5043    | 19.3    | 54     | -48   | 9     |
| MTG, STG, IPL,                                             | L   | 40                | 1581    | 16.5    | -51    | -57   | 6     |
| Cerebellum posterior lobe,<br>Ligual gyrus                 | L   |                   | 321     | 8.3     | -15    | -87   | -21   |
| MFC                                                        | L/R |                   | 212     | 8.7     | 0      | 42    | -9    |
| MFG                                                        | L   | 10                | 359     | 7.9     | -36    | 57    | 3     |
| ACC, Caudate                                               | R   |                   | 643     | 9.9     | 9      | 6     | 18    |
| SFG                                                        | R   | 6                 | 796     | 11.8    | 12     | 51    | 48    |
| Precuneus                                                  | R   | 7                 | 105     | 6.4     | 6      | -60   | 39    |
| MFG, Precentral gyrus                                      | R   | 6                 | 456     | 10.2    | 45     | 3     | 48    |
| <b>IC19</b>                                                |     |                   |         |         |        |       |       |
| MFG, SFG, MFC                                              | L/R | 10                | 2290    | 14.3    | -27    | 57    | 18    |
| SFG, SMA, MFG, MFC                                         | L/R | 6                 | 856     | 8.5     | 0      | 15    | 60    |
| MTG                                                        | R   |                   | 193     | 7.3     | 54     | -18   | -18   |
| <b>IC20</b>                                                |     |                   |         |         |        |       |       |
| Lingual gyrus, Cuneus, MOG<br>Cerebellum posterior lobe,   | L/R | 17, 18, 19        | 3555    | 23.1    | 3      | -87   | -6    |

|                                                                                                               |     |                         |         |         |        |         |        |
|---------------------------------------------------------------------------------------------------------------|-----|-------------------------|---------|---------|--------|---------|--------|
| Fusiform gyrus                                                                                                |     |                         |         |         |        |         |        |
| Precuneus                                                                                                     | L/R | 7                       | 301     | 9.9     | 0      | 75      | -42    |
| SMA, MFC,                                                                                                     | L/R | 6                       | 382     | 8.0     | 3      | -6      | 48     |
| <b>IC22</b>                                                                                                   |     |                         |         |         |        |         |        |
| SFG, MFC, ACC, MFG                                                                                            | L/R | 8, 9, 10, 32            | 4141    | 28.3    | 0      | 51      | 30     |
| PCC, Precuneus                                                                                                | L/R |                         | 381     | 11.9    | 3      | -54     | 15     |
| MTG                                                                                                           | L   | 39                      | 167     | 7.5     | -48    | -72     | 18     |
| <b>IC23</b>                                                                                                   |     |                         |         |         |        |         |        |
| Cuneus, PCC, Fusiform gyrus<br>Cerebellum posterior lobe,<br>Lingual gyrus, Precuneus, MOG                    | L/R | 18, 19,<br>30,31        | 6168    | 25.6    | 12     | -69     | -3     |
| STG                                                                                                           | R   | 22,38                   | 212     | 7.8     | 60     | 9       | 0      |
| MFC                                                                                                           | L/R | 9                       | 279     | 7.9     | 0      | 42      | 18     |
| Precentral gyrus                                                                                              | R   | 6                       | 248     | 11.3    | 39     | -18     | 39     |
| Precuneus                                                                                                     | L   | 7                       | 302     | 7.2     | -15    | -63     | 57     |
| <b>IC31</b>                                                                                                   |     |                         |         |         |        |         |        |
| IPL, Postcentral gyrus, STG,<br>Insula, IFG, Precentral gyrus                                                 | R   | 2, 7, 13, 40,<br>41     | 6136    | 23.5    | 57     | -24     | 36     |
| Cerebellum posterior lobe                                                                                     | R   |                         | 183     | 7.7     | 18     | -57     | -18    |
| MTG                                                                                                           | L/R | 37                      | 295/257 | 8.9/9.1 | -54/54 | -63/-60 | -3/-12 |
| IFG                                                                                                           | L   | 9                       | 477     | 10.3    | -54    | 9       | 15     |
| SFG, MFC                                                                                                      | L   | 10                      | 681     | 9.6     | -3     | 27      | 66     |
| Precuneus                                                                                                     | L   | 31                      | 286     | 7.9     | -6     | -63     | 27     |
| MCC                                                                                                           | L/R | 24                      | 320     | 9.8     | 9      | 3       | 39     |
| SFG                                                                                                           | R   | 6                       | 374     | 7.5     | 24     | 0       | 75     |
| <b>IC33</b>                                                                                                   |     |                         |         |         |        |         |        |
| Precuneus, SPL, PCC,<br>MOG, lingual gyrus                                                                    | L/R | 7, 18, 19,<br>40        | 4905    | 22.4    | 24     | -72     | 54     |
| SFG, MFC                                                                                                      | L   | 10                      | 829     | 10.3    | -9     | 48      | 39     |
| Cerebellum posterior lobe                                                                                     | L   |                         | 244     | 6.4     | -21    | -75     | -39    |
| Fusiform gyrus,<br>Cerebellum posterior lobe                                                                  | R   | 37                      | 698     | 11.7    | 51     | -54     | -21    |
| IFG, Precentral gyrus                                                                                         | L   |                         | 643     | 9.6     | -57    | 24      | 15     |
| MFG                                                                                                           | R   | 6                       | 382     | 8.5     | 33     | 0       | 72     |
| <b>IC34</b>                                                                                                   |     |                         |         |         |        |         |        |
| IFG, MFG, Precentral gyrus,<br>IPL, Insula, Postcentral gyrus,<br>Precuneus, STG, MTG,<br>Supramarginal gyrus | R   | 6, 9, 13, 40,<br>46, 47 | 6380    | 26.5    | 51     | 18      | 24     |
| MOG, Fusiform gyrus,<br>Cerebellum posterior lobe                                                             | L   | 18, 19                  | 1054    | 9.2     | -45    | -78     | -18    |
| Lingual gyrus                                                                                                 | R   |                         | 151     | 7.7     | 6      | -93     | -9     |
| STG                                                                                                           | L   | 13                      | 314     | 9.9     | -39    | -24     | 6      |
| IFG, MFG                                                                                                      | L   |                         | 429     | 10.0    | -45    | 18      | 27     |

|                                                                                                     |     |                          |         |         |        |         |         |
|-----------------------------------------------------------------------------------------------------|-----|--------------------------|---------|---------|--------|---------|---------|
| MFC, SFG, SMA                                                                                       | L/R | 6, 8, 9                  | 455     | 12.3    | 3      | 36      | 45      |
| <b>IC35</b>                                                                                         |     |                          |         |         |        |         |         |
| Parahippocampa gyrus, Lenticular nucleus, Putamen, IFG, Thalamus, Uncus, Pons, MFG, Caudate, Insula | L/R | 47                       | 6424    | 13.0    | 24     | 12      | -15     |
| <b>IC36</b>                                                                                         |     |                          |         |         |        |         |         |
| IFG, Insula, STG, STG, MFG, Lenticular nucleus, Putamen, Precentral gyrus, IPL, ACC, SFG, MFC       | L/R | 6, 9, 10, 13, 22, 44, 47 | 6550    | 18.4    | 36     | 12      | -3      |
| MCC, MFC, SMA,                                                                                      | L/R | 8, 24, 32                | 1940    | 12.8    | -6     | 6       | 45      |
| Cerebellum posterior lobe                                                                           | L/R |                          | 154/279 | 6.7/7.6 | -39/42 | -75/-63 | -27/-27 |
| ITG, Fusiform gyrus                                                                                 | R   | 20                       | 352     | 8.6     | 42     | -12     | -30     |
| MTG                                                                                                 | L   | 39                       | 159     | 6.0     | -42    | -75     | 24      |
| IPL                                                                                                 | R   | 40                       | 200     | 9.1     | 60     | -33     | 27      |
| Precentral gyrus                                                                                    | L   |                          | 177     | 7.4     | -45    | -9      | 57      |
| <b>IC37</b>                                                                                         |     |                          |         |         |        |         |         |
| IFG, MTG, STG, ITG                                                                                  | L   | 21, 47                   | 2938    | 22.1    | -54    | 21      | 9       |
| IFG, Precentral gyrus, STG                                                                          | R   | 47                       | 1400    | 17.2    | 45     | 30      | -15     |
| MOG                                                                                                 | R   | 19                       | 353     | 7.0     | 30     | -81     | 6       |
| Cerebellum posterior lobe                                                                           | R   |                          | 284     | 6.4     | 30     | -72     | -36     |
| SFG                                                                                                 | L   | 10                       | 230     | 10.1    | -18    | 57      | 27      |
| SFG, SMA,                                                                                           | L/R | 6, 10                    | 1372    | 13.6    | -9     | 12      | 66      |
| MCC                                                                                                 | L/R |                          | 306     | 9.2     | 0      | -12     | 39      |
| IPL                                                                                                 | L   | 40                       | 249     | 8.1     | -45    | -39     | 57      |
| <b>IC40</b>                                                                                         |     |                          |         |         |        |         |         |
| MFG, IFG, IPL, MFC, Precentral gyrus, SFG, Postcentral gyrus, Insula, Precuneus                     | L   | 6, 8, 9, 40, 46          | 6483    | 25.7    | -48    | 24      | 27      |
| SFG                                                                                                 | R   | 10                       | 175     | 9.4     | 27     | 57      | 3       |
| MFG, IFG                                                                                            | R   | 9, 46                    | 955     | 17.0    | 54     | 33      | 27      |
| MOG                                                                                                 | R   | 19                       | 372     | 8.3     | 57     | -69     | 15      |
| <b>IC44</b>                                                                                         |     |                          |         |         |        |         |         |
| MFC, ACC, IFG, SFG, Insula                                                                          | L/R | 10                       | 4698    | 22.7    | -3     | 42      | 3       |
| MCC                                                                                                 | L/R |                          | 452     | 9.3     | 0      | -12     | 30      |
| MFG                                                                                                 | R   |                          | 536     | 7.6     | 42     | 0       | 60      |
| Cerebellum posterior lobe                                                                           | L   |                          | 399     | 9.5     | -27    | -33     | -21     |
| Parahippocampal gyrus                                                                               | R   |                          | 295     | 7.8     | 24     | -18     | -30     |
| <b>IC45</b>                                                                                         |     |                          |         |         |        |         |         |
| MFG, SFG, MFC, SMA, IFG, ACC, Precentral gyrus, Precuneus                                           | L   | 6, 7, 8, 9, 10, 32       | 6551    | 21.0    | -30    | 51      | 24      |
| MTG                                                                                                 | R   | 19                       | 716     | 9.0     | 51     | -78     | 24      |
| IFG                                                                                                 | R   |                          | 190     | 7.4     | 48     | 33      | 15      |

|                                                                                 |     |                       |           |           |        |         |         |
|---------------------------------------------------------------------------------|-----|-----------------------|-----------|-----------|--------|---------|---------|
| Supramarginal gyrus, IPL                                                        | L   | 40                    | 404       | 9.2       | -57    | -51     | 33      |
| Precuneus                                                                       | R   |                       | 175       | 6.6       | 15     | -69     | 33      |
| Postcentral gyrus                                                               | R   |                       | 243       | 6.4       | 39     | -24     | 45      |
| <b>IC50</b>                                                                     |     |                       |           |           |        |         |         |
| MFG, SFG, MFC, MCC, IFG, ACC, STG, SMA, Insula                                  | L/R | 6, 8, 9, 10, 32, 46   | 6377      | 21.4      | 39     | 42      | 33      |
| MTG, MOG                                                                        | L   | 19                    | 1053      | 10.6      | -48    | -84     | 9       |
| Lingual gyrus                                                                   | R   |                       | 188       | 9.0       | 12     | -96     | -15     |
| IPL, Supramarginal gyrus                                                        | R   | 40                    | 428       | 9.7       | 63     | -42     | 36      |
| Precuneus                                                                       | R   | 7                     | 531       | 7.5       | 6      | -60     | 48      |
| <b>IC52</b>                                                                     |     |                       |           |           |        |         |         |
| IPL, Precuneus, SPL, Angular gyrus                                              | L   | 7, 40                 | 2692      | 19.8      | -33    | -63     | 48      |
| IPL                                                                             | R   | 40                    | 692       | 16.0      | 45     | -63     | 54      |
| IFG, Precentral gyrus, STG                                                      | R   |                       | 540       | 9.2       | 54     | 24      | -6      |
| SFG                                                                             | R   |                       | 119       | 7.3       | 15     | 48      | 36      |
| STG                                                                             | R   |                       | 223       | 8.6       | 60     | -27     | 12      |
| <b>IC54</b>                                                                     |     |                       |           |           |        |         |         |
| MOG, Fusiform gyrus, MTG, Cerebellum posterior lobe, ITG, Parahippocampal gyrus | L/R | 18, 19, 37            | 3781/3213 | 13.8/15.3 | -36/45 | -81/-66 | 0/-6    |
| SFG                                                                             | L/R | 9                     | 925       | 10.2      | 21     | 42      | 54      |
| IPL, Postcentral gyrus                                                          | L   | 40                    | 340       | 8.6       | -57    | -27     | 42      |
| MFC, MCC                                                                        | L/R | 32                    | 663       | 8.1       | 3      | 21      | 42      |
| <b>IC55</b>                                                                     |     |                       |           |           |        |         |         |
| MTG, IPL, PCC, STG, Cuneus, Supramarginal gyrus, ITG, Angular gyrus             | R   | 7, 19, 20, 31, 39, 40 | 5797      | 26.2      | 45     | -72     | 36      |
| MFG, SFG, MFC                                                                   | R   | 6, 8, 9, 10           | 2687      | 17.7      | 30     | 30      | 57      |
| STG, MFG, IFG, Insula, Precentral gyrus, Postcentral gyrus                      | L   | 22                    | 2089      | 13.1      | -48    | 9       | -9      |
| Angular gyrus, Precuneus                                                        | L   | 39                    | 753       | 15.8      | -39    | -69     | 33      |
| SFG, MFC                                                                        | L   | 6                     | 345       | 10.8      | -6     | 3       | 75      |
| <b>IC57</b>                                                                     |     |                       |           |           |        |         |         |
| SFG, MFC, Precentral gyrus, SMA, MCC, Cuneus, Precuneus, IPL, MTG               | L/R | 6, 8, 19, 32, 40      | 5609      | 14.9      | -3     | 6       | 66      |
| STG                                                                             | L/R |                       | 222/219   | 8.0/7.9   | -48/60 | 15/0    | -12/0   |
| MFC                                                                             | L/R |                       | 434       | 10.9      | -3     | 57      | 15      |
| Precuneus                                                                       | L/R | 7                     | 418       | 7.9       | 0      | -45     | 72      |
| MFG, Precentral gyrus, Postcentral gyrus                                        | L   | 6                     | 1742      | 13.4      | -45    | -9      | 51      |
| <b>IC60</b>                                                                     |     |                       |           |           |        |         |         |
| MFG, SFG, MFC,                                                                  | L   | 8                     | 1407      | 16.8      | -45    | 39      | 15      |
| MTG                                                                             | L/R |                       | 336/401   | 10.5/11.2 | -54/57 | -51/-48 | -21/-18 |

|                          |     |        |           |           |        |         |       |
|--------------------------|-----|--------|-----------|-----------|--------|---------|-------|
| MFG, IFG                 | R   | 10, 46 | 1208      | 20.1      | 42     | 48      | 6     |
| PCC, MCC                 | L/R |        | 1252      | 12.3      | 3      | -36     | 48    |
| IPL, Supramarginal gyrus | L/R | 40     | 1344/1574 | 19.1/16.5 | -60/54 | -39/-42 | 39/42 |

The MNI (Montreal Neurological Institute) coordinates show the coordinates of the peak voxels. Clusters with  $k < 100$  are not listed. ACC: anterior cingulate gyrus; SFG: superior frontal gyrus; MFG: middle frontal gyrus; IFG: inferior frontal gyrus; MFC: medial frontal cortex; MTG: middle temporal gyrus; STG: superior temporal gyrus; ITG: inferior temporal gyrus; PCC: posterior cingulate gyrus; SPL: superior parietal lobule; IPL: inferior parietal lobule; SMA: supplementary motor area; MCC: mid-cingulate cortex; MOG: middle occipital gyrus.
