# Supplementary material for: Shared facial emotion processing functional network findings in medication-naïve major depressive disorder and healthy individuals: detection by sICA
Source: Springer Nature journal article supplement (doi:10.1186/s12888-018-1631-0), 2018-04-10
Supplement: MOESM4 [file 15604672]

**Table S2 Beta weights of all ICs at each task condition and related *p* values**

| IC                                                                                      | 1          | 2         | 3         | 6         | 7         | 8         | 9         | 10        | 11        | 13        | 14        | 17        | 18        | 19        | 20        | 22        |        |
|-----------------------------------------------------------------------------------------|------------|-----------|-----------|-----------|-----------|-----------|-----------|-----------|-----------|-----------|-----------|-----------|-----------|-----------|-----------|-----------|--------|
| <b>Mean beta weight values</b>                                                          |            |           |           |           |           |           |           |           |           |           |           |           |           |           |           |           |        |
| <b>F</b>                                                                                | <b>1</b>   | 0.143     | -0.381    | -0.348    | -0.050    | -0.180    | 0.194     | 0.426     | -0.099    | 0.070     | -0.191    | 0.058     | 0.011     | 0.057     | -0.175    | -0.247    | 0.106  |
|                                                                                         |            | 0.470     | 1.463     | 1.221     | 1.273     | 0.854     | 0.829     | 0.801     | 1.420     | 1.147     | 1.711     | 0.887     | 0.560     | 0.375     | 0.848     | 0.792     | 0.880  |
|                                                                                         | <b>2</b>   | 0.449     | -0.135    | -0.434    | 0.062     | -0.135    | -0.085    | 0.586     | -0.144    | -0.111    | -0.733    | -0.341    | -0.043    | 0.025     | 0.384     | -0.329    | 0.207  |
|                                                                                         |            | 0.585     | 0.956     | 1.144     | 2.215     | 0.979     | 0.799     | 1.000     | 1.567     | 0.738     | 1.643     | 0.961     | 0.608     | 0.583     | 0.812     | 1.158     | 1.035  |
|                                                                                         | <b>all</b> | 0.287     | -0.265    | -0.388    | 0.003     | -0.159    | 0.062     | 0.501     | -0.120    | -0.015    | -0.446    | -0.130    | -0.014    | 0.042     | 0.088     | -0.285    | 0.153  |
|                                                                                         |            | 0.545     | 1.248     | 1.177     | 1.766     | 0.908     | 0.821     | 0.897     | 1.480     | 0.974     | 1.689     | 0.937     | 0.579     | 0.481     | 0.872     | 0.974     | 0.950  |
| <b>H</b>                                                                                | <b>1</b>   | 0.133     | -0.355    | 0.401     | 0.127     | -0.320    | -0.175    | -0.016    | -0.152    | -0.136    | 0.231     | -0.127    | -0.255    | -0.133    | 0.019     | -0.321    | -0.023 |
|                                                                                         |            | 0.673     | 0.818     | 1.017     | 1.362     | 0.747     | 1.069     | 0.731     | 1.517     | 0.671     | 1.608     | 1.070     | 0.548     | 0.577     | 1.130     | 0.755     | 1.012  |
|                                                                                         | <b>2</b>   | -0.122    | -0.189    | 0.386     | -0.133    | -0.225    | 0.229     | -0.143    | -0.188    | 0.185     | 0.200     | 0.142     | -0.126    | -0.045    | -0.204    | -0.130    | 0.001  |
|                                                                                         |            | 0.541     | 0.771     | 1.030     | 2.459     | 0.622     | 1.084     | 0.874     | 1.296     | 1.466     | 2.041     | 1.281     | 1.089     | 0.606     | 1.689     | 1.071     | 1.055  |
|                                                                                         | <b>all</b> | 0.013     | -0.277    | 0.394     | 0.004     | -0.275    | 0.015     | -0.075    | -0.169    | 0.015     | 0.217     | 0.000     | -0.194    | -0.092    | -0.086    | -0.231    | -0.012 |
|                                                                                         |            | 0.624     | 0.795     | 1.016     | 1.946     | 0.687     | 1.087     | 0.798     | 1.407     | 1.120     | 1.811     | 1.173     | 0.842     | 0.588     | 1.414     | 0.916     | 1.025  |
| <b>N</b>                                                                                | <b>1</b>   | -0.150    | 0.237     | -0.251    | -0.277    | 0.007     | 0.354     | -0.122    | 0.148     | 0.131     | -0.358    | 0.158     | 0.165     | 0.171     | 0.138     | 0.191     | 0.170  |
|                                                                                         |            | 0.495     | 0.649     | 1.172     | 0.929     | 0.793     | 1.111     | 0.632     | 1.283     | 0.712     | 1.843     | 0.824     | 0.551     | 0.504     | 1.062     | 0.819     | 0.674  |
|                                                                                         | <b>2</b>   | -0.093    | -0.014    | 0.086     | -0.007    | -0.109    | 0.167     | -0.074    | 0.302     | -0.150    | 0.410     | 0.102     | 0.030     | 0.187     | -0.140    | 0.085     | 0.086  |
|                                                                                         |            | 0.780     | 0.871     | 1.479     | 2.480     | 0.952     | 0.796     | 1.146     | 1.223     | 1.217     | 2.241     | 1.220     | 0.848     | 0.629     | 1.879     | 0.716     | 0.634  |
|                                                                                         | <b>all</b> | -0.124    | 0.119     | -0.092    | -0.150    | -0.047    | 0.266     | -0.100    | 0.221     | -0.001    | 0.004     | 0.132     | 0.102     | 0.179     | 0.007     | 0.141     | 0.130  |
|                                                                                         |            | 0.641     | 0.766     | 1.326     | 1.820     | 0.867     | 0.973     | 0.904     | 1.248     | 0.985     | 2.061     | 1.021     | 0.704     | 0.562     | 1.498     | 0.769     | 0.652  |
| <b><i>P</i> values of group difference, condition difference, and their interaction</b> |            |           |           |           |           |           |           |           |           |           |           |           |           |           |           |           |        |
| <b>Group</b>                                                                            | .436       | .580      | .511      | .750      | .915      | .793      | .691      | .869      | .589      | .680      | .395      | .720      | .519      | .811      | .987      | .847      |        |
| <b>Con</b>                                                                              | .000*      | .030      | .004*     | .907      | .260      | .392      | .000*     | .228      | .979      | .163      | .306      | .255      | .121      | .515      | .029      | .684      |        |
| <b>Inter</b>                                                                            | .065       | .353      | .610      | .769      | .792      | .155      | .708      | .913      | .286      | .200      | .291      | .644      | .864      | .206      | .644      | .872      |        |
| <b>Continued</b>                                                                        |            |           |           |           |           |           |           |           |           |           |           |           |           |           |           |           |        |
| <b>IC</b>                                                                               | <b>23</b>  | <b>31</b> | <b>33</b> | <b>34</b> | <b>35</b> | <b>36</b> | <b>37</b> | <b>40</b> | <b>44</b> | <b>45</b> | <b>50</b> | <b>52</b> | <b>54</b> | <b>55</b> | <b>57</b> | <b>60</b> |        |
| <b>Mean beta weight values</b>                                                          |            |           |           |           |           |           |           |           |           |           |           |           |           |           |           |           |        |

|                                                                                  |      |        |        |        |        |        |        |        |        |        |        |        |        |        |        |        |        |
|----------------------------------------------------------------------------------|------|--------|--------|--------|--------|--------|--------|--------|--------|--------|--------|--------|--------|--------|--------|--------|--------|
| F                                                                                | 1    | 0.085  | -0.173 | -0.327 | -0.285 | 0.051  | -0.022 | 0.098  | -0.182 | 0.063  | 0.152  | -0.371 | -0.186 | -0.207 | 0.011  | -0.162 | -0.306 |
|                                                                                  |      | 0.734  | 0.802  | 1.344  | 0.746  | 0.445  | 0.539  | 0.597  | 0.700  | 1.068  | 0.881  | 1.133  | 1.176  | 0.637  | 0.905  | 0.693  | 0.952  |
|                                                                                  | 2    | -0.026 | 0.000  | -0.273 | -0.167 | 0.003  | 0.081  | -0.002 | 0.052  | -0.056 | 0.312  | -0.214 | 0.363  | -0.203 | -0.022 | -0.111 | -0.080 |
|                                                                                  |      | 1.006  | 0.827  | 1.537  | 0.539  | 0.319  | 0.906  | 0.596  | 0.518  | 0.895  | 1.071  | 0.805  | 1.092  | 0.659  | 0.682  | 0.700  | 0.580  |
|                                                                                  | all  | 0.033  | -0.091 | -0.301 | -0.230 | 0.028  | 0.027  | 0.051  | -0.072 | 0.007  | 0.227  | -0.297 | 0.073  | -0.205 | -0.004 | -0.138 | -0.200 |
|                                                                                  |      | 0.867  | 0.812  | 1.428  | 0.655  | 0.389  | 0.731  | 0.594  | 0.627  | 0.985  | 0.971  | 0.988  | 1.162  | 0.643  | 0.802  | 0.691  | 0.801  |
| H                                                                                | 1    | -0.018 | -0.129 | -0.224 | -0.308 | -0.030 | -0.046 | 0.053  | -0.097 | -0.101 | 0.071  | -0.327 | -0.228 | -0.278 | -0.201 | -0.142 | -0.182 |
|                                                                                  |      | 0.859  | 0.688  | 1.300  | 0.908  | 0.324  | 0.424  | 0.621  | 0.564  | 0.875  | 0.813  | 1.294  | 0.846  | 0.579  | 0.936  | 0.602  | 1.098  |
|                                                                                  | 2    | 0.125  | -0.255 | -0.227 | -0.274 | -0.057 | -0.258 | 0.062  | -0.220 | 0.166  | 0.022  | -0.103 | -0.067 | -0.056 | 0.070  | -0.299 | -0.077 |
|                                                                                  |      | 0.840  | 0.860  | 1.418  | 0.831  | 0.350  | 0.640  | 0.427  | 1.027  | 0.785  | 1.076  | 1.118  | 1.727  | 0.694  | 0.840  | 0.769  | 1.036  |
|                                                                                  | all  | 0.049  | -0.188 | -0.226 | -0.292 | -0.042 | -0.146 | 0.057  | -0.155 | 0.024  | 0.048  | -0.222 | -0.152 | -0.173 | -0.074 | -0.216 | -0.133 |
|                                                                                  |      | 0.847  | 0.770  | 1.346  | 0.866  | 0.334  | 0.543  | 0.534  | 0.811  | 0.838  | 0.939  | 1.211  | 1.327  | 0.641  | 0.896  | 0.685  | 1.062  |
| N                                                                                | 1    | 0.085  | 0.056  | -0.085 | 0.253  | 0.065  | 0.089  | -0.016 | 0.179  | -0.034 | -0.004 | 0.192  | 0.113  | -0.016 | 0.382  | 0.108  | -0.071 |
|                                                                                  |      | 0.847  | 0.670  | 0.960  | 0.622  | 0.261  | 0.542  | 0.461  | 0.694  | 0.722  | 0.649  | 1.085  | 1.145  | 0.897  | 0.679  | 0.567  | 0.760  |
|                                                                                  | 2    | -0.049 | -0.038 | 0.443  | 0.111  | 0.056  | -0.023 | 0.072  | 0.116  | 0.015  | 0.142  | 0.166  | -0.254 | -0.096 | 0.150  | 0.207  | -0.126 |
|                                                                                  |      | 1.077  | 0.899  | 1.291  | 0.750  | 0.386  | 0.652  | 0.657  | 1.156  | 0.743  | 1.008  | 0.964  | 1.909  | 1.066  | 0.657  | 0.706  | 0.830  |
|                                                                                  | all  | 0.022  | 0.012  | 0.163  | 0.186  | 0.061  | 0.036  | 0.025  | 0.149  | -0.011 | 0.065  | 0.180  | -0.059 | -0.054 | 0.273  | 0.154  | -0.097 |
|                                                                                  |      | 0.957  | 0.781  | 1.150  | 0.684  | 0.323  | 0.595  | 0.559  | 0.933  | 0.727  | 0.834  | 1.022  | 1.551  | 0.973  | 0.674  | 0.634  | 0.788  |
| <b>P values of group difference, condition difference, and their interaction</b> |      |        |        |        |        |        |        |        |        |        |        |        |        |        |        |        |        |
| <b>Group</b>                                                                     | .610 | .779   | .071   | .961   | .379   | .171   | .985   | .756   | .320   | .337   | .140   | .213   | .972   | .463   | .971   | .390   |        |
| <b>Con</b>                                                                       | .983 | .468   | .067   | .002*  | .297   | .154   | .960   | .283   | .965   | .570   | .040   | .521   | .001*  | .920   | .008   | .751   |        |
| <b>Inter</b>                                                                     | .693 | .588   | .538   | .660   | .959   | .432   | .687   | .503   | .532   | .806   | .837   | .246   | .208   | .567   | .586   | .695   |        |

The IC row shows the IC numbers.

F: Fearful; H: happy; N: neutral; Group: group difference; Con: condition difference; Inter: group and condition interaction. In each condition, 1: health control; 2: MDD; all: all the subjects. In each group, the upper row shows mean beta weight values, the lower row shows the standard deviations.

\*: IC that survived after FDR correction with  $p < 0.05$ .
